# Supplementary material for: Economic Analysis of Border Control Policies during COVID-19 Pandemic: A Modelling Study to Inform Cross-Border Travel Policy between Singapore and Thailand
Source: MDPI journal article supplement (doi:10.3390/ijerph20054011), 2023-02-23
Supplement: s1 [file s1]

## **Supporting Information S1. Input value and data source of parameters**

### **Table of Contents**

|                                                                            |   |
|----------------------------------------------------------------------------|---|
| Supporting Information S1. Input value and data source of parameters ..... | 2 |
| Table S1 Parameters on economics and tourism.....                          | 2 |
| Table S2 Parameters on COVID-19 measures.....                              | 3 |
| Table S3 Risk profile of COVID-19 patients and vaccine efficacy .....      | 4 |
| Table S4 Parameters on cost related to COVID-19 cases.....                 | 5 |
| Table S5 Parameters on health outcome .....                                | 6 |
| Table S6 Parameters on COVID-19 transmission .....                         | 7 |
| References.....                                                            | 8 |

**Table S1 Parameters on economics and tourism**

| Parameter description                                                  | Value        | Data source                                                                                                                  |
|------------------------------------------------------------------------|--------------|------------------------------------------------------------------------------------------------------------------------------|
| Per capita expenditure of tourist from Thailand (TH) in Singapore (SG) | US\$811.53   | Singapore Tourism Board (STB)                                                                                                |
| Per capita expenditure of business traveler from TH in SG              | US\$1623.06  | Assumed as twice of tourist from TH in SG                                                                                    |
| Per capita expenditure of tourist from SG in TH                        | US\$1028.72  | Tourism Authority of Thailand (TAT)                                                                                          |
| Per capita expenditure of business traveler from SG in TH              | US\$2057.44  | Assumed as twice of tourist from SG in TH                                                                                    |
| Aviation spending per traveler for a round trip between SG and TH      | US\$251.60   | Singapore Airlines, Scoot and AirAsia                                                                                        |
| Length of stay in TH for travelers from SG                             | 5.54 days    | TAT                                                                                                                          |
| Daily consumption expenditure of SG residents if not travelling        | US\$37.36    | Department of Statistics (DOS), Singapore                                                                                    |
| Length of stay in SG for travelers from TH                             | 3.46 days    | STB                                                                                                                          |
| Daily consumption expenditure of TH residents if not travelling        | US\$10.22    | National Statistical Office (NSO), Thailand                                                                                  |
| Monthly income of population in SG                                     | US\$3174.00  | Ministry of Manpower (MOM), Singapore                                                                                        |
| Monthly income of population in TH                                     | US\$500.00   | Minimum wage rate in Thailand, suggested by Health Intervention and Technology Assessment Program (HITAP), Thailand          |
| Cost effectiveness threshold of SG                                     | US\$59797.75 | World Bank, assumed to equal 1 GDP per capita                                                                                |
| Cost effectiveness threshold of TH                                     | US\$7189.40  |                                                                                                                              |
| Cost effectiveness threshold of SG (DSA)                               | US\$17393.25 | World Bank, assumed to equal 3 GDP per capita                                                                                |
| Cost effectiveness threshold of TH (DSA)                               | US\$21568.20 |                                                                                                                              |
| Tourism multiplier in SG (DSA)                                         | 2.35         | Estimated based on input-output table <sup>1</sup> and tourism receipt component <sup>2</sup> of Thai travelers in Singapore |
| Tourism multiplier in TH (DSA)                                         | 2.09         | Sindechara <sup>3</sup>                                                                                                      |

**Table S2 Parameters on COVID-19 measures**

| Parameter description                                                                                | Value       | Data source                                                                                 |
|------------------------------------------------------------------------------------------------------|-------------|---------------------------------------------------------------------------------------------|
| Daily price of quarantine at SG                                                                      | US\$107.14  | Immigration & Checkpoints Authority (ICA) and Ministry of Health (MOH), Singapore           |
| Daily price of quarantine at TH                                                                      | US\$79.88   | Spot check on hotels in TH                                                                  |
| Percentage productivity loss if quarantined                                                          | 30%         | Ballegooijen et al. <sup>4</sup>                                                            |
| Percentage productivity loss if quarantined (DSA)                                                    | 0%          | Assume no productivity loss due to quarantine/ isolation                                    |
| Antigen sensitivity by log-viral load, logit constant coefficient                                    | -3.748627   | Peto et al. <sup>5</sup>                                                                    |
| Antigen sensitivity by log-viral load, logit linear coefficient                                      | 1.080585    |                                                                                             |
| PCR sensitivity by log-viral load, logit constant coefficient                                        | -2.67331    | Miller et al. <sup>6</sup>                                                                  |
| PCR sensitivity by log-viral load, logit linear coefficient                                          | 0.929224    |                                                                                             |
| Cost of ART test in SG                                                                               | US\$7.5     | Estimated based on advice by MOH, Singapore                                                 |
| Cost of PCR pre-test and confirmation test in SG                                                     | US\$56.25   |                                                                                             |
| Cost of PCR test upon arrival at SG                                                                  | US\$60      |                                                                                             |
| Cost of PCR test during and exit quarantine in SG                                                    | US\$46.88   |                                                                                             |
| Cost of ART test in TH                                                                               | US\$10      | Estimated based on advice by HITAP, Thailand                                                |
| Cost of conducting PCR test in TH                                                                    | US\$34.75   |                                                                                             |
| Administrative cost for test-trace-isolation (TTI) cost associated with one more COVID-19 case in SG | US\$3071.10 | Derived based on labor cost of TTI staff (source: MOH, Singapore; Indeed) and testing cost. |
| Administrative cost for TTI associated with one more COVID-19 case in TH                             | US\$0.00    | No more contact tracing at the time of analysis.                                            |

**Table S3 Risk profile of COVID-19 patients and vaccine efficacy**

| Parameter description                       |                                                    | Value  | Data source                                                                                                                                                                                                                                                                                                                                                                                                                                                                                            |
|---------------------------------------------|----------------------------------------------------|--------|--------------------------------------------------------------------------------------------------------------------------------------------------------------------------------------------------------------------------------------------------------------------------------------------------------------------------------------------------------------------------------------------------------------------------------------------------------------------------------------------------------|
| Unvaccinated local/ secondary cases in SG:  | Probability of asymptomatic                        | 36·94% | <p>Derived based on an age-specific risk profile (source: Oran et al.<sup>7</sup>, Wei et al.<sup>8</sup>, O'Driscoll et al.<sup>9</sup>, Sheikh et al.<sup>10</sup>,) and different age structures of:</p> <ul style="list-style-type: none"> <li>- SG general population (source: DOS, Singapore)</li> <li>- TH general population (source: PopulationPyramid.Net)</li> <li>- travelers from SG to TH (source: TAT, Thailand)</li> <li>- travelers from TH to SG (source: STB, Singapore)</li> </ul> |
|                                             | Probability of mild/ moderate                      | 50·55% |                                                                                                                                                                                                                                                                                                                                                                                                                                                                                                        |
|                                             | Probability of severe                              | 9·56%  |                                                                                                                                                                                                                                                                                                                                                                                                                                                                                                        |
|                                             | Probability of critical                            | 2·06%  |                                                                                                                                                                                                                                                                                                                                                                                                                                                                                                        |
|                                             | Probability of death                               | 0·89%  |                                                                                                                                                                                                                                                                                                                                                                                                                                                                                                        |
| Unvaccinated local/ secondary cases in TH:  | Probability of asymptomatic                        | 37·93% |                                                                                                                                                                                                                                                                                                                                                                                                                                                                                                        |
|                                             | Probability of mild/ moderate                      | 50·65% |                                                                                                                                                                                                                                                                                                                                                                                                                                                                                                        |
|                                             | Probability of severe                              | 8·75%  |                                                                                                                                                                                                                                                                                                                                                                                                                                                                                                        |
|                                             | Probability of critical                            | 1·86%  |                                                                                                                                                                                                                                                                                                                                                                                                                                                                                                        |
|                                             | Probability of death                               | 0·81%  |                                                                                                                                                                                                                                                                                                                                                                                                                                                                                                        |
| Unvaccinated cases traveling from SG to TH: | Probability of asymptomatic                        | 36·94% |                                                                                                                                                                                                                                                                                                                                                                                                                                                                                                        |
|                                             | Probability of mild/ moderate                      | 53·67% |                                                                                                                                                                                                                                                                                                                                                                                                                                                                                                        |
|                                             | Probability of severe                              | 7·35%  |                                                                                                                                                                                                                                                                                                                                                                                                                                                                                                        |
|                                             | Probability of critical                            | 1·48%  |                                                                                                                                                                                                                                                                                                                                                                                                                                                                                                        |
|                                             | Probability of death                               | 0·56%  |                                                                                                                                                                                                                                                                                                                                                                                                                                                                                                        |
| Unvaccinated cases traveling from TH to SG: | Probability of asymptomatic                        | 37·93% |                                                                                                                                                                                                                                                                                                                                                                                                                                                                                                        |
|                                             | Probability of mild/ moderate                      | 54·94% |                                                                                                                                                                                                                                                                                                                                                                                                                                                                                                        |
|                                             | Probability of severe                              | 5·68%  |                                                                                                                                                                                                                                                                                                                                                                                                                                                                                                        |
|                                             | Probability of critical                            | 1·10%  |                                                                                                                                                                                                                                                                                                                                                                                                                                                                                                        |
|                                             | Probability of death                               | 0·34%  |                                                                                                                                                                                                                                                                                                                                                                                                                                                                                                        |
| Vaccine in SG                               | Coverage in general population                     | 84%    | MOH, Singapore, as in Oct 2021                                                                                                                                                                                                                                                                                                                                                                                                                                                                         |
|                                             | Coverage in general population (DSA)               | 92%    | MOH, Singapore, as in Jan 2023                                                                                                                                                                                                                                                                                                                                                                                                                                                                         |
|                                             | Percentage reduction against infection             | 69%    | National Center of Infectious Disease (NCID), Singapore                                                                                                                                                                                                                                                                                                                                                                                                                                                |
|                                             | Percentage reduction against symptomatic infection | 80%    | Public Health England <sup>11</sup>                                                                                                                                                                                                                                                                                                                                                                                                                                                                    |
|                                             | Percentage reduction against severe/critical cases | 95%    | Stowe et al. <sup>12</sup>                                                                                                                                                                                                                                                                                                                                                                                                                                                                             |
| Vaccine in TH                               | Coverage in general population                     | 35%    | Ministry of Public Health (MoPH), Thailand, as in Oct 2021                                                                                                                                                                                                                                                                                                                                                                                                                                             |
|                                             | Coverage in general population (DSA)               | 76%    | Ministry of Public Health (MoPH), Thailand, as in Jan 2023                                                                                                                                                                                                                                                                                                                                                                                                                                             |
|                                             | Percentage reduction against infection             | 50%    | AstraZeneca <sup>13</sup>                                                                                                                                                                                                                                                                                                                                                                                                                                                                              |
|                                             | Percentage reduction against symptomatic infection | 79%    |                                                                                                                                                                                                                                                                                                                                                                                                                                                                                                        |
|                                             | Percentage reduction against severe/critical cases | 95%    |                                                                                                                                                                                                                                                                                                                                                                                                                                                                                                        |

**Table S4 Parameters on cost related to COVID-19 cases**

| Parameter description                                            |               | Value        | Data source                                                                                                                                      |
|------------------------------------------------------------------|---------------|--------------|--------------------------------------------------------------------------------------------------------------------------------------------------|
| Cost of treating an unvaccinated case in SG                      | asymptomatic  | US\$78.75    | Derived based on data shared by MOH and NCID, Singapore, and HITAP, Thailand, taking into account cost of hospitalization, tests, and transport. |
|                                                                  | mild/moderate | US\$91.25    |                                                                                                                                                  |
|                                                                  | severe        | US\$6937.50  |                                                                                                                                                  |
|                                                                  | critical      | US\$22650.00 |                                                                                                                                                  |
| Cost of treating a vaccinated case in SG                         | asymptomatic  | US\$71.25    |                                                                                                                                                  |
|                                                                  | mild/moderate | US\$81.25    |                                                                                                                                                  |
|                                                                  | severe        | US\$4912.50  |                                                                                                                                                  |
|                                                                  | critical      | US\$16500.00 |                                                                                                                                                  |
| Cost of treating an unvaccinated case in TH                      | asymptomatic  | US\$34.75    |                                                                                                                                                  |
|                                                                  | mild/moderate | US\$34.75    |                                                                                                                                                  |
|                                                                  | severe        | US\$3469.30  |                                                                                                                                                  |
|                                                                  | critical      | US\$16451.57 |                                                                                                                                                  |
| Cost of treating a vaccinated case in TH                         | asymptomatic  | US\$34.75    |                                                                                                                                                  |
|                                                                  | mild/moderate | US\$34.75    |                                                                                                                                                  |
|                                                                  | severe        | US\$3469.30  |                                                                                                                                                  |
|                                                                  | critical      | US\$16451.57 |                                                                                                                                                  |
| Cost of treating a unvaccinated/ vaccinated case in SG/ TH (DSA) |               | -            | Double all the base case values above                                                                                                            |
| Percentage productivity loss if hospitalized                     |               | 100%         | Assumed                                                                                                                                          |
| Percentage productivity loss of asymptomatic cases               |               | 30%          | Assumed to be the same as productivity loss due to quarantine.                                                                                   |
| Percentage productivity loss of asymptomatic cases (DSA)         |               | 0%           |                                                                                                                                                  |
| Percentage productivity loss of mild/moderate cases              |               | 100%         | Assume symptomatic cases need to rest without working                                                                                            |

**Table S5 Parameters on health outcomes**

| Parameter description                                                   |                              | Value    | Data source                                                                                 |
|-------------------------------------------------------------------------|------------------------------|----------|---------------------------------------------------------------------------------------------|
| Quality of life (QoL) of general population (SG and TH)                 |                              | 0.95     | Abdin et al. <sup>14</sup>                                                                  |
| Percentage reduction in QoL due to isolation                            |                              | 2.92%    | Wong et al. <sup>15</sup>                                                                   |
| Quality-adjusted life years (QALY) loss of an asymptomatic case:        | Unvaccinated, isolated in SG | 0.000684 | Estimated based on length of isolation.                                                     |
|                                                                         | Vaccinated, isolated in SG   | 0.000456 |                                                                                             |
|                                                                         | Unvaccinated, isolated in TH | 0.00213  |                                                                                             |
|                                                                         | Vaccinated, isolated in TH   | 0.00213  |                                                                                             |
| QALY loss of an unvaccinated case:                                      | Mild/moderate                | 0.43     | Basu et al. <sup>16</sup>                                                                   |
|                                                                         | Severe                       | 0.50     |                                                                                             |
|                                                                         | Critical                     | 0.60     |                                                                                             |
| Percentage QALY loss saved for symptomatic cases if vaccinated          |                              | 10%      | Assumed                                                                                     |
| Percentage QALY loss saved for symptomatic cases if vaccinated (DSA)    |                              | 0%       | Assume vaccinated and unvaccinated cases have same QALY loss upon showing symptoms          |
| QALY loss of all the close contacts of one case due to quarantine in SG |                              | 0.00127  | Estimated based on length of isolation.                                                     |
| QALY loss of all the close contacts of one case due to quarantine in TH |                              | 0        |                                                                                             |
| QALY loss of COVID death in SG                                          |                              | 8.62     | Estimated based on average age of COVID-19 mortality and life expectancy. Discounted by 3%. |
| QALY loss of COVID death in TH                                          |                              | 3.76     |                                                                                             |

**Table S6 Parameters on COVID-19 transmission**

| Parameter description                                         | Value    | Data source                                                                                                               |
|---------------------------------------------------------------|----------|---------------------------------------------------------------------------------------------------------------------------|
| Reproduction rate (R0) without effect of vaccines             | 7        | High estimate for Delta                                                                                                   |
| R0 without effect of vaccines (DSA)                           | 10       | High estimate for Omicron                                                                                                 |
| Daily infection rate in SG among general population           | 0.00059  | WHO<br>Worldometers<br>MOH, Singapore                                                                                     |
| Daily infection rate in TH among general population           | 0.00014  |                                                                                                                           |
| Daily infection rate in SG among general population (DSA)     | 0.000885 | Increase by 50% from base case values                                                                                     |
| Daily infection rate in TH among general population (DSA)     | 0.00021  |                                                                                                                           |
| Prevalence in SG                                              | 0.0059   | Derived by assuming daily infection rate equals 1/10 of prevalence, i.e. the duration of disease is 10 days <sup>17</sup> |
| Prevalence in TH                                              | 0.0014   |                                                                                                                           |
| Prevalence in SG (DSA)                                        | 0.00885  | Increase by 50% from base case values                                                                                     |
| Prevalence in TH (DSA)                                        | 0.0021   |                                                                                                                           |
| Mean slope of increasing log-viral load                       | 2.806329 | Jones et al. <sup>18</sup>                                                                                                |
| Standard deviation (SD) of slope of increasing log-viral load | 0.39     |                                                                                                                           |
| Mean slope of decreasing log-viral load                       | -0.39152 |                                                                                                                           |
| SD of slope of decreasing log-viral load                      | 0.02     |                                                                                                                           |
| Mean peak log-viral load                                      | 10.0635  |                                                                                                                           |
| SD of peak log-viral load                                     | 0.7      |                                                                                                                           |
| Mean days to peak log-viral load                              | 4.3      |                                                                                                                           |
| SD of days to peak log-viral load                             | 0.92     |                                                                                                                           |
| Mean days from peak log-viral load to symptoms                | 4.3      |                                                                                                                           |
| SD of days from peak log-viral load to symptoms               | 0.488    |                                                                                                                           |

## References

1. Department of Statistics Singapore. National Accounts Input-Output Tables. 2017. Available online: <https://www.singstat.gov.sg/find-data/search-by-theme/economy/national-accounts/latest-data> (accessed on 18 February 2023).
2. Singapore Tourism Analytics Network. Tourism Receipts Statistics. Available online: <https://stan.stb.gov.sg/content/stan/en/home.html> (accessed on 18 February 2023).
3. Sindechara, T. Economic Impact Evaluation from Tourism in Designated Area for Sustainable Tourism. 2017. Available online: <https://data.go.th/dataset/ac3db6c0-2f8c-444d-b639-1008569ff62e/resource/3699e612-115e-4014-a941-afa80454bfbc/download/multiplier-effects.pdf> (accessed on 18 February 2023).
4. Ballegooijen, H.; Goossens, L.; Bruin, R.H.; Michels, R.; Krol, M. Concerns, quality of life, access to care and productivity of the general population during the first 8 weeks of the coronavirus lockdown in Belgium and the Netherlands. *BMC Health Serv. Res.* 2021, 21, 1–8.
5. Peto, T.; UK COVID-19 Lateral Flow Oversight Team. COVID-19: Rapid antigen detection for SARS-CoV-2 by lateral flow assay: A national systematic evaluation of sensitivity and specificity for mass-testing. *EClinicalMedicine* 2021, 36, 100924.
6. Miller, T.E.; Miller, T.E.; Garcia Beltran, W.F.; Bard, A.Z.; Gogakos, T.; Anahtar, M.N.; Astudillo, M.G.; Yang, D.; Thierauf, J.; Fisch, A.S.; Mahowald, G.K.; et al. Clinical sensitivity and interpretation of PCR and serological COVID-19 diagnostics for patients presenting to the hospital. *FASEB J.* 2020, 34, 13877–13884.
7. Oran, D.P.; Topol, E.J. Prevalence of asymptomatic SARS-CoV-2 infection: a narrative review. *Ann. Intern. Med.* 2020, 173, 362–367.
8. EW, W.; Wycliffe, W.E.; Heng, T.C.; Chan, M.; Tong, T.T.; Pada, S.K.; Archuleta, S.; Tat, O.S.; Jiashen, L.; Choon, R.F.K.; Cheng, T.K.; et al. Age and chest radiography as possible parameters for rapid triage in COVID-19 outbreak surge. 2020. <https://doi.org/10.21203/rs.3.rs-88104/v1>
9. O'Driscoll, M.; Santos, G.R.D.; Wang, L.; Cummings, D.A.T.; Azman, A.S.; Paireau, J.; Fontanet, A.; Cauchemez, S.; Salje, H. Age-specific mortality and immunity patterns of SARS-CoV-2. *Nature* 2021, 590, 140–145.
10. Sheikh, A.; McMenamin, J.; Taylor, B.; Robertson, C. SARS-CoV-2 Delta VOC in Scotland: demographics, risk of hospital admission, and vaccine effectiveness. *Lancet* 2021, 397, 2461–2462.
11. *SARS-Cov-2 Variants of Concern and Variants under Investigation in England*; Public Health England: London, UK, 2021.
12. Lopez Bernal J, Andrews N, Gower C, Gallagher E, Simmons R, Thelwall S, Stowe J, Tessier E, Groves N, Dabrera G, et al. Effectiveness of COVID-19 vaccines against hospital admission with the Delta (B.1.617.2) variant. *N. Engl. J. Med.* 2021, 388, 672.
13. AstraZeneca. AZD1222 US Phase III Trial Met Primary Efficacy Endpoint in Preventing COVID-19 at Interim Analysis. 2021. Available online: <https://www.astrazeneca.com/media-centre/press-releases/2021/astrazeneca-us-vaccine-trial-met-primary-endpoint.html> (accessed on 15 July 2021).
14. Abdin, E.; Subramaniam, M.; Vaingankar, J.A.; Luo, N.; Chong, S.A. Population norms for the EQ-5D index scores using Singapore preference weights. *Qual. Life Res.* 2015, 24, 1545–1553.
15. Wong, E.L.; Ho, K.F.; Wong, S.Y.; Cheung, A.W.; Yau, P.S.; Dong, D.; Yeoh, E.K. Views on workplace policies and its impact on health-related quality of life during coronavirus disease (COVID-19) pandemic: cross-sectional survey of employees. *Int. J. Heal. policy Manag.* 2022, 11, 344–353.
16. Basu, A.; Gandhay, V.J. Quality-Adjusted Life-Year Losses Averted With Every COVID-19 Infection Prevented in the United States. *Value Heal.* 2021, 24, 632–640.



17. Herrero, L. How Contagious Is Delta? How Long Are You Infectious? Is It More Deadly? A Quick Guide to the Latest Science. The Conversation. Available online: <https://theconversation.com/how-contagious-is-delta-how-long-are-you-infectious-is-it-more-deadly-a-quick-guide-to-the-latest-science-165538> (accessed on 15 October 2021).
18. Jones, T.C.; Biele, G.; Mühlemann, B.; Veith, T.; Schneider, J.; Beheim-Schwarzbach, J.; Bleicker, T.; Tesch, J.; Schmidt, M.L.; Sander, L.E.; *et al.* Estimating infectiousness throughout SARS-CoV-2 infection course. *Science* 2021, 373, eabi5273.
