# Supplementary material for: Economic Analysis of Border Control Policies during COVID-19 Pandemic: A Modelling Study to Inform Cross-Border Travel Policy between Singapore and Thailand
Source: MDPI journal article supplement (doi:10.3390/ijerph20054011), 2023-02-23
Supplement: s1 [file s1]

**Supporting Information S3. Additional details about testing and quarantine policies in Thailand and Singapore during the period Jan 2021 and Dec 2022**

|          | Thailand                                                                                                                                   | Singapore                                                                                                                                                                                                                                                                                                                                                                         |
|----------|--------------------------------------------------------------------------------------------------------------------------------------------|-----------------------------------------------------------------------------------------------------------------------------------------------------------------------------------------------------------------------------------------------------------------------------------------------------------------------------------------------------------------------------------|
| 2021     |                                                                                                                                            |                                                                                                                                                                                                                                                                                                                                                                                   |
| January  | Test: RT-PCR test within 72 hours before departure<br>Quarantine: 14 days<br><b>Note:</b> this is only for people who have been vaccinated | Test: ART Test on arrival<br>Quarantine: N/A                                                                                                                                                                                                                                                                                                                                      |
| February | Test: RT-PCR test within 72 hours before departure<br>Quarantine: 14 days                                                                  | Test: PCR test on arrival<br>Quarantine: N/A                                                                                                                                                                                                                                                                                                                                      |
| March    | Test: RT-PCR test within 72 hours before departure<br>Quarantine: 14 days                                                                  | Test: PCR test on arrival<br>Quarantine: N/A                                                                                                                                                                                                                                                                                                                                      |
| April    | Test: RT-PCR within 72 hours before departure<br>Quarantine: 7 days (Vaccinated travelers)                                                 | Test: PCR test within 72 hours before departure, on arrival, after 14 days and at the end of their 21 day quarantine period.<br>Quarantine: 21 days                                                                                                                                                                                                                               |
| May      | Test: RT-PCR within 72 hours before departure<br>Quarantine: 7 days (Vaccinated travelers)                                                 | Test: PCR test within 72 hours before departure, upon arrival, and arrivals from most destinations will be issued with a Stay at Home Notice (SHN) for at least 21 days.<br>Quarantine: 21 days                                                                                                                                                                                   |
| June     | Test: RT-PCR within 72 hours before departure<br>Quarantine: 7 days (Vaccinated travelers)                                                 | Test: PCR test within 72 hours before departure, upon arrival, during SHN<br>Quarantine: 7-14 days Stay-Home-Notice (SHN) <ul style="list-style-type: none"> <li>travelers serving SHN in dedicated SHN facilities will be issued Antigen Rapid Test (ART) self-test kits and must undergo ART on the 3rd, 7th and 11th day of their arrival in Singapore.</li> </ul>             |
| July     | Test: RT-PCR within 72 hours before departure and on arrival<br>Quarantine: 0 days if they entered the Phuket Sandbox Program              | Test: PCR test within 72 hours before departure, upon arrival, during SHN<br>Quarantine: 7-14 days Stay-Home-Notice (SHN) <ul style="list-style-type: none"> <li>Quarantine: travelers serving SHN in dedicated SHN facilities will be issued Antigen Rapid Test (ART) self-test kits and must undergo ART on the 3rd, 7th and 11th day of their arrival in Singapore.</li> </ul> |
| August   | Test: RT-PCR within 72 hours before departure and on arrival<br>Quarantine: 0 days if they entered the Phuket Sandbox Program              | Test: PCR test within 72 hours before departure, upon arrival, during Quarantine <ul style="list-style-type: none"> <li>At the end of the 14-day quarantine, a third PCR test will be conducted. Rapid tests are conducted on the third, seventh and eleventh days after entry.</li> </ul> Quarantine: 14 days                                                                    |

|           |                                                                                                                                                                                                           |                                                                                                                                                                      |
|-----------|-----------------------------------------------------------------------------------------------------------------------------------------------------------------------------------------------------------|----------------------------------------------------------------------------------------------------------------------------------------------------------------------|
| September | Test: RT-PCR within 72 hours before departure and on arrival<br>Quarantine: 0 days if they entered the Phuket Sandbox Program                                                                             | Test: PCR test within 48 hours before departure, on arrival, up to two PCR tests during the stay.<br>Quarantine: 0 day (Enter country under Vaccinated Travel Lanes) |
| October   | Test: RT-PCR within 72 hours before departure and on arrival<br>Quarantine: 0 days if they entered the Phuket Sandbox Program                                                                             | Test: PCR test within 48 hours before departure, on arrival<br>Quarantine: 0 day<br>(Enter country under Vaccinated Travel Lanes)                                    |
| November  | Test: RT-PCR within 72 hours before departure and on arrival<br>Quarantine: 0 days if they entered Thailand under Sandbox Program in one of 17 provinces or Test and Go<br>Alternative quarantine: 7 days | Test: PCR/ART test within 48 hours before departure, day 7 of arrival<br>Quarantine: 0 day<br>(Enter country under Vaccinated Travel Lanes)                          |
| December  | Test: RT-PCR within 72 hours before departure and on arrival<br>Quarantine: 0 days if they entered Thailand under the Phuket Sandbox Program<br>Alternative quarantine: 7 days                            | Test: PCR/ART test within 48 hours before departure, day 7 of arrival<br>Quarantine: 0 day<br>(Enter country under Vaccinated Travel Lanes)                          |
| 2022      |                                                                                                                                                                                                           |                                                                                                                                                                      |
| January   | Test: RT-PCR within 72 hours before departure and on arrival<br>Quarantine: 0 days if they entered Thailand under Phuket Sandbox Program<br>Alternative quarantine: 10 days                               | Test: PCR/ART test within 48 hours before departure, on arrival<br>Quarantine: 0 day<br>(Enter country under Vaccinated Travel Lanes)                                |
| February  | Test: RT-PCR within 72 hours before departure and on arrival<br>Quarantine: 0 days if they entered Thailand under Sandbox Program or Test and Go<br>Alternative quarantine: 7 days                        | Test: PCR/ART test within 48 hours before departure<br>Quarantine: 0 day<br>(Enter country under Vaccinated Travel Lanes)                                            |
| March     | Test: RT-PCR within 72 hours before departure and on arrival<br>Quarantine: 0 days if they entered Thailand under the Sandbox Program or Test and Go<br>Alternative quarantine: 5 days                    | Test: PCR/ART test within 48 hours before departure<br>Quarantine: 0 days                                                                                            |
| April     | Test: RT-PCR on arrival<br>Quarantine: 0 days if they entered Thailand under the Sandbox Program or Test and Go<br>Alternative quarantine: 5 days                                                         | Test: No test<br>Quarantine: 0 day                                                                                                                                   |
| May       | Test: No test before departure and on arrival<br>Quarantine: 0 day                                                                                                                                        | Test: No test<br>Quarantine: 0 day                                                                                                                                   |
| June      | Test: No test before departure and on arrival<br>Quarantine: 0 day                                                                                                                                        | Test: No test<br>Quarantine: 0 day                                                                                                                                   |
| July      | Test: RT-PCR or ATK within 72 hours before departure<br>Quarantine: 0 day                                                                                                                                 | Test: No test<br>Quarantine: 0 day                                                                                                                                   |
| August    | Test: No test<br>Quarantine: 0 day                                                                                                                                                                        | Test: No test<br>Quarantine: 0 day                                                                                                                                   |
| September | Test: No test<br>Quarantine: 0 day                                                                                                                                                                        | Test: No test<br>Quarantine: 0 day                                                                                                                                   |
| October   | Test: No test<br>Quarantine: 0 day                                                                                                                                                                        | Test: No test<br>Quarantine: 0 day                                                                                                                                   |

|          |                                    |                                    |
|----------|------------------------------------|------------------------------------|
| November | Test: No test<br>Quarantine: 0 day | Test: No test<br>Quarantine: 0 day |
| December | Test: No test<br>Quarantine: 0 day | Test: No test<br>Quarantine: 0 day |

#### Sources:

##### Thailand:

<https://thailandpass.org/faq/>  
<https://www.gov.uk/foreign-travel-advice/thailand/entry-requirements>  
<https://maputo.thaiembassy.org/en/content/thailand-entry-measures-and-regulations?cate=5f4a21ad6dcd871a3466cf62>  
<https://www.mfa.go.th/en/content/entry-measures-into-thailand-by-air-travel-0105202?cate=5f2916be298eeb02ac2eb389>  
<https://oslo.thaiembassy.org/en/page/updated-measures-on-traveling-to-thailand?menu=6295fd96aa816330ea406663>  
<https://www.caat.or.th/en/archives/56377>  
<https://www.tatnews.org/2021/06/thailand-confirms-reopening-plan-from-1-july-2021/>  
<https://www.mfa.go.th/en/content/thailand-pass-faqs>  
<https://ankara.thaiembassy.org/en/publicservice/entry-to-thailand-during-covid-19?cate=618bb74713f3c853db3b4902>

##### Singapore:

<https://www.mfa.gov.sg/Overseas-Mission/Washington/Mission-Updates/2021/01/Update-on-COVID-19-on-15-Jan-2021>  
<https://trutrip.co/singapore-travel-restrictions-update-feb-2021/>  
[https://travelbans.org/en/asia/singapore#google\\_vignette](https://travelbans.org/en/asia/singapore#google_vignette)  
[https://m.innovare-group.com/singapore/travel\\_and\\_quarantine\\_requirements/](https://m.innovare-group.com/singapore/travel_and_quarantine_requirements/)  
<https://www.visitsingapore.com/travel-guide-tips/travel-requirements/>  
<https://mainlymiles.com/2021/07/27/singapore-aims-to-allow-quarantine-free-travel-from-september/>  
<https://www.caas.gov.sg/who-we-are/newsroom/Detail/singapore-further-reopens-borders-in-cautious-step-by-step-manner>  
<https://www.aviationpros.com/airports/news/21246133/spore-eases-border-measures-for-more-southeast-asian-countries-new-vtls-launched-with-finland-and-sweden>  
<https://safetravel.ica.gov.sg/health/vtsg>  
[https://www.ica.gov.sg/enter-depart/entry\\_requirements](https://www.ica.gov.sg/enter-depart/entry_requirements)  
[https://www.singaporeair.com/en\\_UK/th/travel-info/covid-19/](https://www.singaporeair.com/en_UK/th/travel-info/covid-19/)  
<https://www.moh.gov.sg/news-highlights/details/updates-on-border-measures-for-travellers-and-extending-vaccinated-travel-lanes>  
[https://www.visitsingapore.com/th\\_th/travel-guide-tips/travel-requirements/](https://www.visitsingapore.com/th_th/travel-guide-tips/travel-requirements/)  
<https://www.changiairport.com/en/airport-guide/Covid-19/travel-to-singapore.html>  
<https://www.visitsingapore.com/travel-requirements/atp/>  
<https://www.moh.gov.sg/news-highlights/details/further-easing-of-community-and-border-measures>
